# Supplementary material
Source: MDPI journal article supplement (https://www.mdpi.com/2312-7481/7/9/124)
Supplement: s1 [file s1]

# Supplementary Materials: Field Induced SMM and Vis/NIR luminescence on Mononuclear Lanthanide complexes with 9-anthracenecarboxylate and 2,2':6,2''-terpyridine

Berta Casanovas, Oriol Porcar, Saskia Speed, Ramon Vicente, Mercè Font-Bardía and M. Salah El Fallah

**Table S1.** Continuous shape measures (CShM's) using SHAPE software for **2Tb-5Yb**.

| Polyhedron | Symmetry | 2Tb   | 3Dy   | 4Er   | 5Yb   |
|------------|----------|-------|-------|-------|-------|
| TDD-8      | $D_{2d}$ | 1.921 | 1.902 | 2.342 | 2.363 |
| BTPr-8     | $C_{2v}$ | 3.126 | 3.092 | 2.426 | 2.450 |
| JSD-8      | $T_d$    | 3.155 | 3.105 | 3.924 | 3.931 |
| JBTPr-8    | $C_{2v}$ | 3.231 | 3.177 | 2.516 | 2.551 |

**Table S2.** Hydrogen bonds distances (d; D = donor atom, A = acceptor atom) and angles of **1Eu-5Yb**

|            | H bond         | d(OD...H), Å | d(H...A), Å | d(OD...A), Å | Angle, <sup>0</sup> | (°)      |
|------------|----------------|--------------|-------------|--------------|---------------------|----------|
| <b>1Eu</b> | O1W-H1W...O6   | 0.94(3)      | 2.09(4)     | 2.912(6)     | 146(5)              | -        |
|            | O7-H7A...O6    | 0.813(12)    | 1.921(14)   | 2.6900(15)   | 157.6(18)           | -        |
| <b>2Tb</b> | O7-H7B...O1W   | 0.809(15)    | 1.886(15)   | 2.6931(15)   | 174.6(16)           | -        |
|            | O1W-H1WA...O2  | 0.798(19)    | 2.04(2)     | 2.8147(16)   | 165(2)              | -        |
|            | O1W-H1WB...O1D | 0.804(12)    | 2.083(13)   | 2.8535(15)   | 160(2)              | -1+x,y,z |
|            | O7-H7A...O6    | 0.812(15)    | 1.909(16)   | 2.690(2)     | 161(2)              | -        |
| <b>3Dy</b> | O7-H7B...O1W   | 0.801(17)    | 1.899(18)   | 2.693(2)     | 171(2)              | -        |
|            | O1W-H1WA...O2  | 0.80(2)      | 2.03(2)     | 2.814(3)     | 167.9(19)           | -        |
|            | O1W-H1WB...O1D | 0.834(6)     | 2.030(9)    | 2.855(3)     | 170(2)              | -1+x,y,z |
|            | O7-H7A...O6    | 0.90(4)      | 1.80(3)     | 2.678(3)     | 164(3)              | -        |
| <b>4Er</b> | O7-H7B...O1W   | 0.896(16)    | 1.754(14)   | 2.644(4)     | 171(3)              | -        |
|            | O1W-H1WA...O2  | 0.94(3)      | 1.89(3)     | 2.812(4)     | 168(4)              | -        |
|            | O1W-H1WB...O1D | 0.95(2)      | 1.86(2)     | 2.752(6)     | 156(4)              | -        |
|            | O7-H7A...O6    | 0.90(4)      | 1.81(5)     | 2.678(5)     | 162(4)              | -        |
| <b>5Yb</b> | O7-H7B...O1W   | 0.900(16)    | 1.763(16)   | 2.660(5)     | 174(5)              | 1+x,y,z  |
|            | O1W-H1WA...O2  | 0.90(5)      | 1.92(5)     | 2.811(6)     | 169(6)              | -1+x,y,z |
|            | O1W-H1WB...O1D | 0.90(3)      | 1.84(2)     | 2.721(9)     | 165(8)              | -1+x,y,z |
|            | O7-H7A...O6    | 0.90(4)      | 1.81(5)     | 2.678(5)     | 162(4)              | -        |

**Table S3.** Supramolecular  $\pi$ - $\pi$  stacking interactions for **1Eu-5Yb**

| Complex    | Contact      | Symmetry code (°) | Cg-Cg distance (Å) | Displacement (Å) |
|------------|--------------|-------------------|--------------------|------------------|
| <b>1Eu</b> | Cg(1)-Cg(2)' | 2-x,1-y,1-z       | 3.666(2)           | 1.388            |
|            | Cg(4)-Cg(4)' | 1-x,1-y,-z        | 3.632(3)           | 1.396            |
| <b>2Tb</b> | Cg(1)-Cg(2)' | 1-x,-y,-z         | 3.7575(8)          | 1.03             |
|            | Cg(1)-Cg(7)' | x,y,z             | 3.5542(8)          | 1.145            |
|            | Cg(3)-Cg(3)' | -x,-y,-z          | 3.429(4)           | 0.702            |
| <b>3Dy</b> | Cg(1)-Cg(2)' | 1-x,-y,-z         | 3.7485(14)         | 1.048            |
|            | Cg(1)-Cg(6)' | x,y,z             | 3.5496(13)         | 1.136            |
|            | Cg(3)-Cg(3)' | -x,-y,-z          | 3.5642(15)         | 0.487            |
| <b>4Er</b> | Cg(1)-Cg(3)' | 1/2-x,1/2+y,1/2-z | 3.739(2)           | 1.331            |
|            | Cg(1)-Cg(6)' | x,y,z             | 3.551(3)           | 0.925            |
| <b>5Yb</b> | Cg(1)-Cg(3)' | 3/2-z,1/2+y,1/2-z | 3.750(3)           | 1.333            |
|            | Cg(1)-Cg(6)' | x,y,z             | 3.555(4)           | 0.933            |

**Table S4.** Relaxation parameters values for the best fit of  $\chi_M''$  and  $\chi_M'$  vs frequency using generalised Debye model for **3Dy**

| T, K | $\chi_s, \text{cm}^3 \text{mol}^{-1}$ | $\chi_T, \text{cm}^3 \text{mol}^{-1}$ | $\tau, \text{s}$ | $\alpha$ |
|------|---------------------------------------|---------------------------------------|------------------|----------|
| 6.2  | 0.1                                   | 2.2                                   | 2.0E-04          | 0.06     |
| 6.0  | 0.1                                   | 2.2                                   | 2.6E-04          | 0.06     |
| 5.7  | 0.1                                   | 2.3                                   | 3.3E-04          | 0.06     |
| 5.5  | 0.1                                   | 2.4                                   | 4.3E-04          | 0.07     |
| 5.3  | 0.1                                   | 2.5                                   | 5.6E-04          | 0.07     |
| 5.0  | 0.1                                   | 2.7                                   | 7.5E-04          | 0.07     |
| 4.7  | 0.1                                   | 2.8                                   | 1.0E-03          | 0.08     |
| 4.5  | 0.1                                   | 3.0                                   | 1.4E-03          | 0.08     |
| 4.3  | 0.1                                   | 3.1                                   | 1.9E-03          | 0.08     |
| 4.1  | 0.1                                   | 3.2                                   | 2.5E-03          | 0.09     |
| 4.0  | 0.1                                   | 3.3                                   | 2.9E-03          | 0.09     |
| 3.9  | 0.1                                   | 3.4                                   | 3.4E-03          | 0.10     |
| 3.8  | 0.1                                   | 3.5                                   | 4.1E-03          | 0.10     |
| 3.7  | 0.1                                   | 3.6                                   | 4.9E-03          | 0.11     |
| 3.6  | 0.1                                   | 3.7                                   | 5.8E-03          | 0.11     |
| 3.5  | 0.1                                   | 3.8                                   | 7.0E-03          | 0.12     |
| 3.4  | 0.1                                   | 4.0                                   | 8.5E-03          | 0.13     |

**Table S5.** Relaxation parameters values for the best fit of  $\chi_M''$  and  $\chi_M'$  vs frequency using generalised Debye model for **4Er**.

| T, K | $\chi_s, \text{cm}^3 \text{mol}^{-1}$ | $\chi_T, \text{cm}^3 \text{mol}^{-1}$ | $\tau, \text{s}$ | $\alpha$ |
|------|---------------------------------------|---------------------------------------|------------------|----------|
| 2.7  | 0.31                                  | 2.17                                  | 1.21E-04         | 0.05     |
| 2.6  | 0.32                                  | 2.24                                  | 1.54E-04         | 0.05     |
| 2.5  | 0.32                                  | 2.31                                  | 1.92E-04         | 0.06     |
| 2.4  | 0.32                                  | 2.38                                  | 2.35E-04         | 0.07     |
| 2.3  | 0.33                                  | 2.47                                  | 2.85E-04         | 0.08     |
| 2.2  | 0.33                                  | 2.58                                  | 3.53E-04         | 0.09     |
| 2.1  | 0.33                                  | 2.65                                  | 3.94E-04         | 0.09     |
| 2.0  | 0.34                                  | 2.78                                  | 4.64E-04         | 0.10     |
| 1.9  | 0.34                                  | 2.92                                  | 5.40E-04         | 0.11     |
| 1.8  | 0.35                                  | 2.98                                  | 5.87E-04         | 0.10     |

**Table S6.** Relaxation parameters values for the best fit of  $\chi_M''$  and  $\chi_M'$  vs. frequency using generalised Debye model for compound **5Yb**

| T, K | $\chi_s, \text{cm}^3 \text{mol}^{-1}$ | $\chi_T, \text{cm}^3 \text{mol}^{-1}$ | $\tau, \text{s}$ | $\alpha$ |
|------|---------------------------------------|---------------------------------------|------------------|----------|
| 3.2  | 0.03                                  | 0.51                                  | 1.63E-04         | 0.12     |
| 3.0  | 0.04                                  | 0.55                                  | 2.14E-04         | 0.13     |
| 2.8  | 0.04                                  | 0.59                                  | 2.79E-04         | 0.14     |
| 2.5  | 0.04                                  | 0.65                                  | 3.89E-04         | 0.16     |
| 2.3  | 0.04                                  | 0.72                                  | 5.78E-04         | 0.19     |
| 2.0  | 0.04                                  | 0.82                                  | 8.74E-04         | 0.21     |
| 1.8  | 0.04                                  | 0.89                                  | 1.21E-03         | 0.24     |

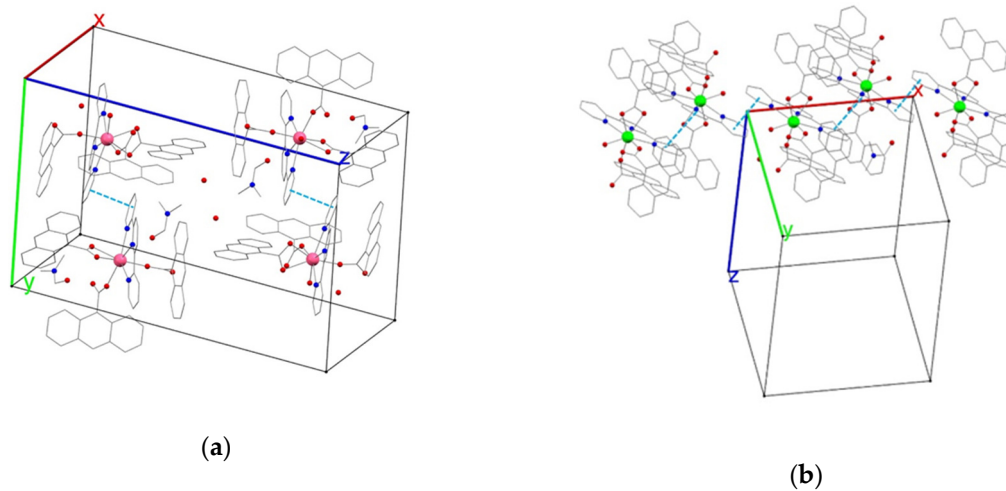

**Figure S1.** Supramolecular arrangement representation in compounds (a) **4Er**; (b) **5Yb**.  $\pi$ - $\pi$  stacking interactions are indicated in blue.

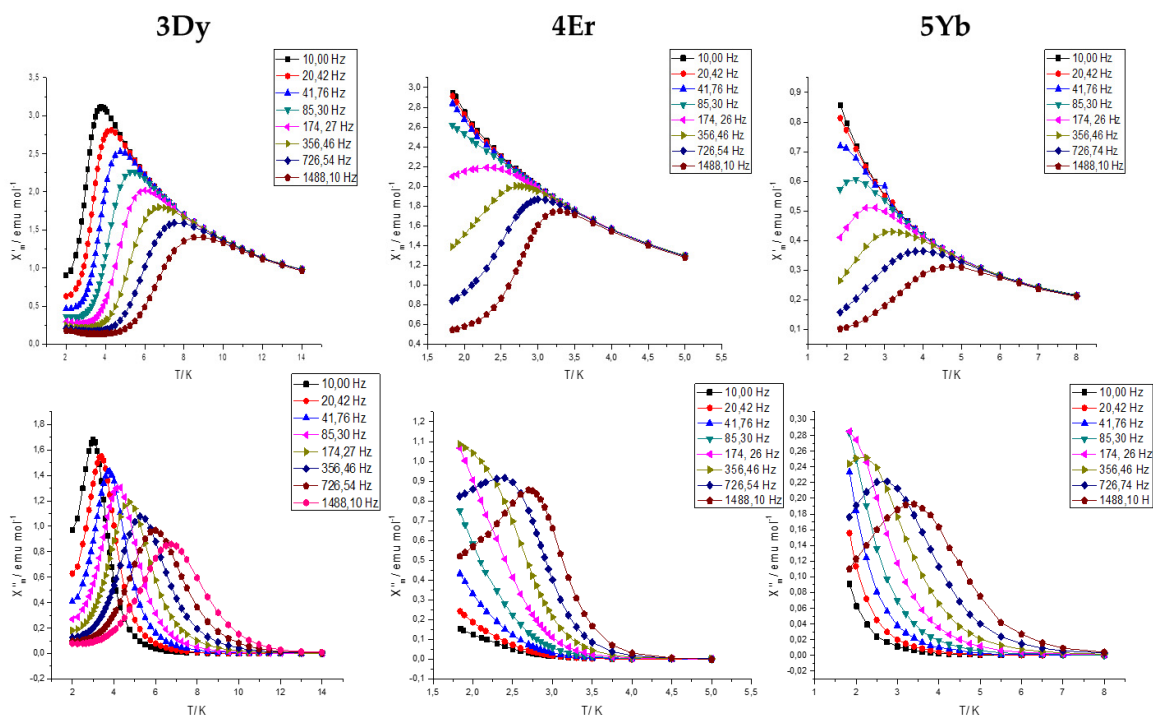

**Figure S2.**  $\chi_M'$  and  $\chi_M''$  vs T plots for compounds **3Dy-5Yb**.

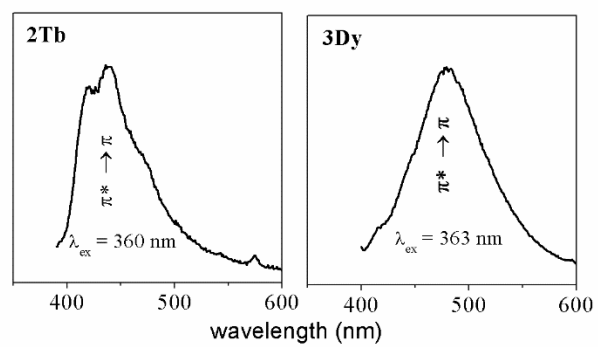

**Figure S3.** Emission spectra for **2Tb** and **3Dy** at rt.

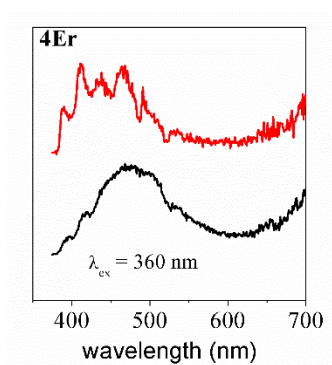

**Figure S4.** Emission spectra for **4Er** at rt. (back line) and at 77 K (red line).
